# Supplementary material for: Structural conservation of an ancient tRNA sensor in eukaryotic glutaminyl-tRNA synthetase
Source: PubMed Central journal article supplement — Nucleic Acids Res. 2011 Dec 16;40(8):3723–31. doi: 10.1093/nar/gkr1223 (PMC3333875; doi:10.1093/nar/gkr1223), 2011-12-16
Supplement: supp_gkr1223_GKR1223_Grant_Supplementary_Material_12_05_2011.pdf [file supp_gkr1223_GKR1223_Grant_Supplementary_Material_12_05_2011.pdf]

## Supplementary Tables and Figure Legends

### Supplementary Tables

**Table S1: Oligonucleotides**

| Oligonucleotide Name | Construct or Use                         | Sequence                                                                |
|----------------------|------------------------------------------|-------------------------------------------------------------------------|
| QB832ADFP            | Full length GLN4+ His6                   | AATTCCATCAACCTTAAA ATGGCTCACCATCACCATCACCAT<br>ATGTCTTCTGTAGAAGAATTGACT |
| QB832ADRP            | GLN4 to end                              | CTTCCAAACCACTCTTGGAGTTGCGTCCTTCAA                                       |
| QB1115ADFP           | GLN4 187 – end                           | AATTCCATCAACCTTAAAATGATCAAGAAGAAGACCAAGAAT                              |
| QB1114ADFP           | GLN4 211 – end                           | AATTCCATCAACCTTAAAATGTCTTCCGGTCCAAAGAGG                                 |
| QB1034ADFP           | GLN4 216 – end                           | AATTCCATCAACCTTAAAATGAGGACTATGTTCAATGAAGGTTTC<br>C                      |
| QB1012ADFP           | GLN4 1-187                               | AATTCCATCAACCTTAAAATGTCTTCTGTAGAAGAATTGACT                              |
| QB1012ADRP           | GLN4 1-187                               | CTTCCAAACCACT GATTAAGTCTCTCTCATCCTT                                     |
| HWI P239             | <i>gln4::Kan</i> DNA                     | GAAGACATATATAAGAAACAAAAGGCAC                                            |
| HWI P234             | <i>gln4::Kan</i> DNA                     | GCCGTATATTGCTAAGGACACC                                                  |
| HWI P237             | GLN4 -517                                | GGGTCCTGGTTTCAATCTGCAAATAAGCTTCCTAACCGC                                 |
| HWI P238             | GLN4 +527                                | CTTGTTCTGTCTGTTTAAAGAATCCCAGTGACAAGAATGACA                              |
| HWI P181             | tRNA <sup>Gln(CUG)</sup>                 | GGGTCCTGGTTTCAATCTGCAAATAAGCTTCCTAACCGC                                 |
| HWI P182             | tRNA <sup>Gln(CUG)</sup>                 | CTTGTTCTGTCTGTTTAAAGAATCCCAGTGACAAGAATGACA                              |
| HWI P235             | tRNA <sup>Gln(CUG)</sup>                 | TCTCCTGGATCCGGCTCGTATGTTGTGTGG                                          |
| HWI P236             | tRNA <sup>Gln(CUG)</sup>                 | CCAGTGAATTCGAGCTCGGTAC                                                  |
| HWI P257             | Purification of tRNA <sup>Gln(CUG)</sup> | 5'-Bio- TGGAGGTCCCACCCGGATTTCGAACTGG 3'                                 |
| HWI P237             | JE1060AP and JE1062AP                    | GGGTCCTGGTTTCAATCTGCAAATAAGCTTCCTAACCGC                                 |
| HWI P238             | JE1060Ap and JE1062AP                    | CTTGTTCTGTCTGTTTAAAGAATCCCAGTGACAAGAATGACA                              |
| HWI P239             | <i>gln4-ΔKAN</i> (-554)                  | GAAGACATATATAAGAAACAAAAGGCAC                                            |
| HWI P234             | <i>gln4-ΔKAN</i> (+586)                  | GCCGTATATTGCTAAGGACACC                                                  |
| HWI P40              | Check <i>gln4-ΔKAN</i> (-790)            | AGCAGCTGGAGCCACTAATGTTAG                                                |
| P256                 | Check <i>gln4-ΔKAN</i> +811              | CCAAATCCTAGCCCAAACCTCTTCG                                               |
| HWI P285             | G-432 Xho1                               | CCTCCACTCGAG CCCTTCACGTTTCTGACAATAGTTCTG                                |
| HWI P288             | G+288R Mlu1                              | CTCCAC ACGCGT CCATGTAGATTAACGTTATATTTTCCTTC                             |

**Table S2: Yeast Strains**

| Strain   | Genotype                                                                                                           | Source                     |
|----------|--------------------------------------------------------------------------------------------------------------------|----------------------------|
| BY4741   | <i>MATa his3Δ1 met15Δ0 leu2Δ0 ura3Δ0</i>                                                                           | Open Biosystems            |
| MEM 70   | BY4741 <i>gln4-Δ::kan<sup>R</sup> [CEN URA3 GLN4]</i>                                                              | This study                 |
| MEM 133  | BY4741 <i>gln4-Δ::kan<sup>R</sup> ade2::GLN4::MET15</i>                                                            | This study                 |
| MEM 141  | BY4741 <i>gln4-Δ::kan<sup>R</sup> ade2::gln4(211-809)::MET15</i>                                                   | This study                 |
| BCY123   | <i>MATa, pep4-3::HIS3, prb1::LEU2, bar1::HISG, lys2::GAL1/10-GAL4, can1, ade2, trp1, his3, ura3-52, leu2-3,112</i> | Mark Macbeth <sup>23</sup> |
| QB1012AD | BCY123 JE1012A [2 micron <i>URA3 GLN4(1-187)-PT</i> ]                                                              | This study                 |
| EJG1117  | <i>MATX leu2 trp1ura3 prb1-112 pep4-1 his3Δ-pGAL10-GAL4</i>                                                        | Erin O'Shea                |
| EJG1473  | EJG117 <i>sam1Δ::NatR sam2Δ::KanR</i>                                                                              | This study                 |
| MA337    | EJ1473 JE1012A [2 micron <i>URA3 GLN4(1-187)-PT</i> ]                                                              | This study                 |

23. Macbeth, M. R., Lingam, A. T. & Bass, B. L. (2004) Evidence for auto-inhibition by the N terminus of hADAR2 and activation by dsRNA binding. *RNA* **10**, 1563-1571.

**Table S3: Plasmids used in this study**

| <b>Plasmid</b> | <b>Description</b>                                                                                                                                                               | <b>Source/ Reference</b> |
|----------------|----------------------------------------------------------------------------------------------------------------------------------------------------------------------------------|--------------------------|
| BG2483         | 2 micron, <i>URA3</i> vector with $P_{GAL1}$ , LIC cloning sites, ORF is fused to PT tag containing a recognition site for protease 3C, HA epitope, His6, ZZ domain of protein A | Malkowski <sup>24</sup>  |
| JE1012         | <i>GLN4</i> (1-187) in BG2483                                                                                                                                                    | This study               |
| JE1115         | <i>GLN4</i> (187-809) in BG2483                                                                                                                                                  | This study               |
| JE1033         | <i>GLN4</i> (212-809) in BG2483                                                                                                                                                  | This study               |
| JE1034         | <i>GLN4</i> (216-809) in BG2483                                                                                                                                                  | This study               |
| JE1135         | <i>GLN4</i> -G <sub>112</sub> A V <sub>113</sub> A G <sub>114</sub> A in BG2483                                                                                                  | This study               |
| JE1136         | <i>GLN4</i> -G <sub>112</sub> P in BG2483                                                                                                                                        | This study               |
| JE1137         | <i>GLN4</i> -W <sub>160</sub> A in BG2483                                                                                                                                        | This study               |
| JE1140         | <i>GLN4</i> -W <sub>160</sub> F in BG2483                                                                                                                                        | This study               |
| PYEX4T         | 2 micron, <i>URA3 leu2D</i>                                                                                                                                                      | Martzen <sup>25</sup>    |
| JE1135         | tRNA Glu-CUC (AB209-11) in PYEX4T                                                                                                                                                | This study               |
| JE1060         | <i>GLN4</i> +/- 500 in AVA579[ <i>URA3 CEN</i> ]                                                                                                                                 | This study               |
| AVA579         | <i>URA3 CEN</i> plasmid derived from YCPlac33 by insertion of LIC cloning site                                                                                                   |                          |

24. Malkowski, M. G. *et al.* (2007) Blocking S-adenosylmethionine synthesis in yeast allows selenomethionine incorporation and multiwavelength anomalous dispersion phasing. *Proc Natl Acad Sci U S A* **104**, 6678-6683.

25. Martzen, M. R. *et al.* (1999) A biochemical genomics approach for identifying genes by the activity of their products. *Science* **286**, 1153-1155..

**Table S4:** Data collection, phasing and refinement statistics for **MAD** (SeMet) structures

| Gln4 N-term                                         |                       |                   |               |
|-----------------------------------------------------|-----------------------|-------------------|---------------|
| <b>Data collection</b>                              |                       |                   |               |
| Space group                                         | P12 <sub>1</sub> 1    |                   |               |
| Cell dimensions                                     |                       |                   |               |
| <i>a</i> , <i>b</i> , <i>c</i> (Å)                  | 40.79                 | 34.61             | 74.25         |
| $\alpha$ , $\beta$ , $\gamma$ (°)                   | 90.00                 | 97.61             | 90.00         |
|                                                     | <i>Peak</i>           | <i>Inflection</i> | <i>Remote</i> |
| Wavelength                                          | 0.97937               | 0.97904           | 0.91162       |
| Resolution (Å)                                      | 29.2-2.30 (2.42-2.30) |                   |               |
| <i>R</i> <sub>merge</sub>                           | 0.098(0.485)          | 0.098(0.467)      | 0.100(0.490)  |
| <i>R</i> <sub><i>pim</i></sub>                      | 0.062(0.309)          | 0.062(0.297)      | 0.063(0.312)  |
| <i>I</i> / $\sigma$ <i>I</i>                        | 12.9(3.4)             | 12.7(3.6)         | 13.0(3.4)     |
| Completeness (%)                                    | 100.0(100.0)          | 100.0(100.0)      | 99.9(99.8)    |
| Redundancy                                          | 6.5(6.6)              | 6.5(6.6)          | 6.5(6.6)      |
| <b>Refinement</b>                                   |                       |                   |               |
| Resolution (Å)                                      | 29.2-2.30             |                   |               |
| No. reflections                                     | 9385                  |                   |               |
| <i>R</i> <sub>work</sub> / <i>R</i> <sub>free</sub> | 0.182/0.211           |                   |               |
| No. atoms                                           |                       |                   |               |
| Protein                                             | 1489                  |                   |               |
| Ligand/ion                                          | 0                     |                   |               |
| Water                                               | 82                    |                   |               |
| B-factors                                           |                       |                   |               |
| Protein                                             | 35.10                 |                   |               |
| Ligand/ion                                          |                       |                   |               |
| Water                                               | 42.36                 |                   |               |
| R.m.s deviations                                    |                       |                   |               |
| Bond lengths (Å)                                    | 0.007                 |                   |               |
| Bond angles (°)                                     | 1.035                 |                   |               |
| Ramachandran                                        |                       |                   |               |
| Favored                                             | 98.4%                 |                   |               |
| Allowed                                             | 1.6%                  |                   |               |
| Disallowed                                          | 0.0%                  |                   |               |

\*Highest resolution shell is shown in parenthesis

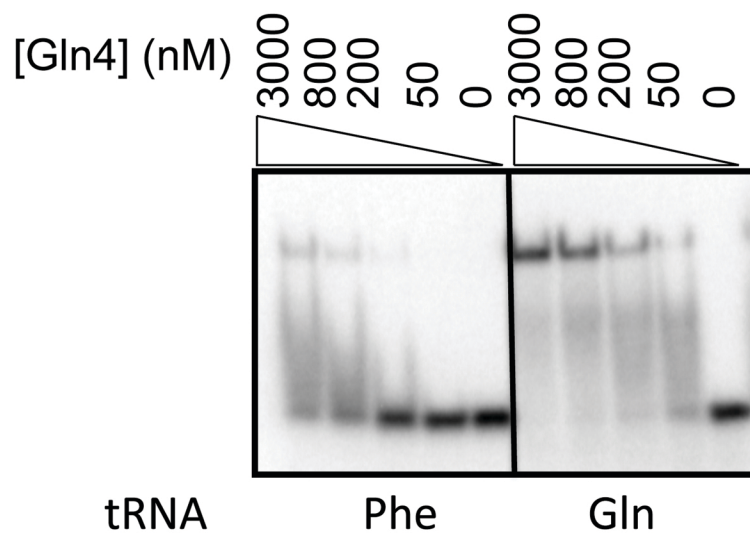

**Figure S1. Gln4 protein binds more efficiently to native tRNA<sup>Gln(CUG)</sup> than to native tRNA<sup>Phe</sup>.**

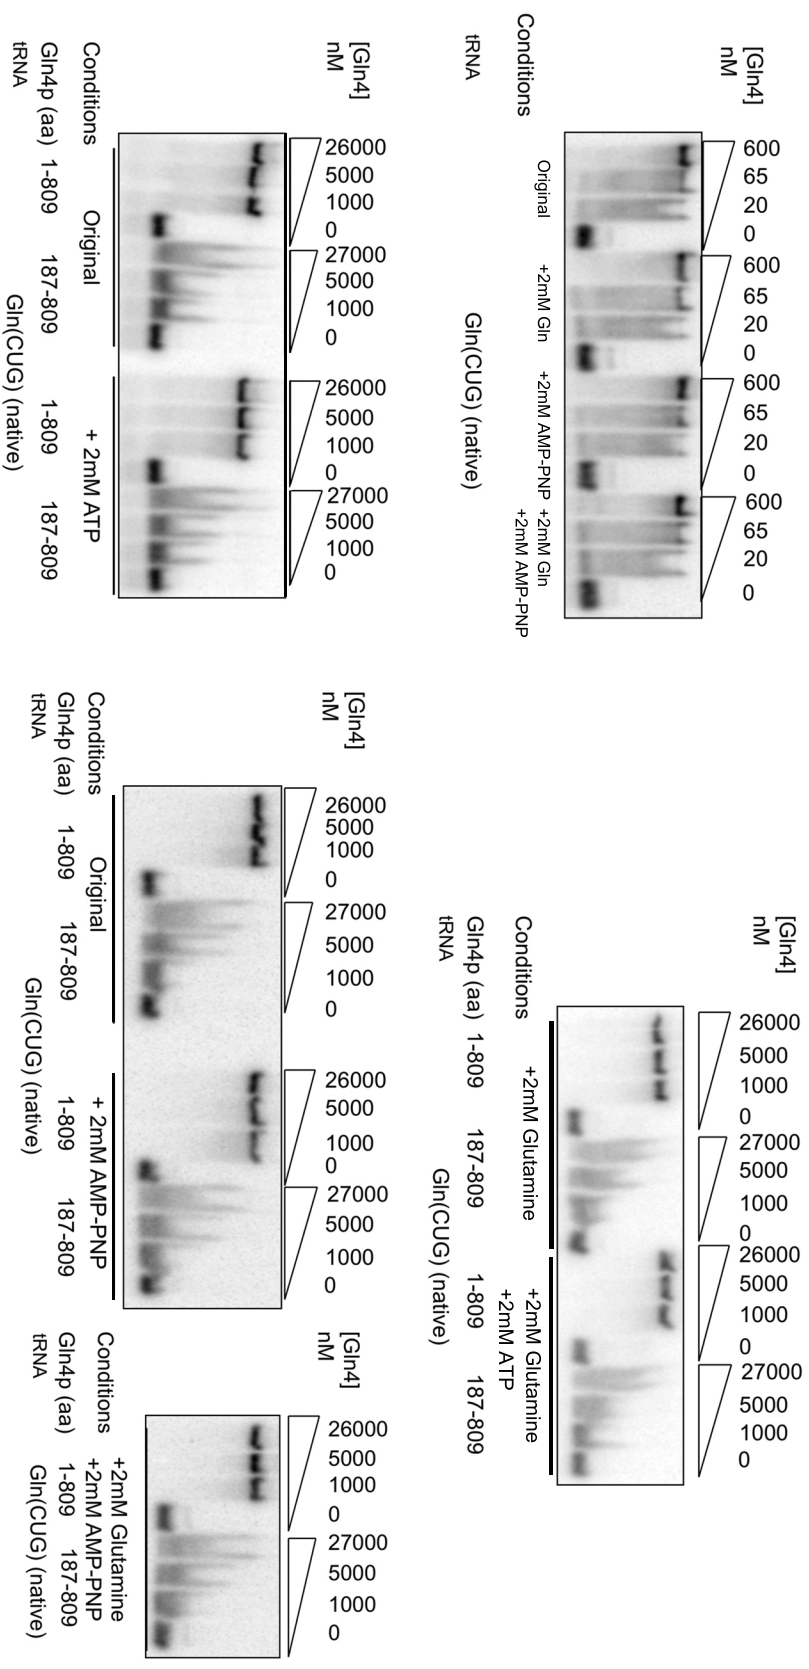

**Figure S2. Effects of glutamine, ATP and AMP-PNP on binding of Gln4 and Gln4p (187-809) to tRNA<sup>Gln</sup>(CUG).**

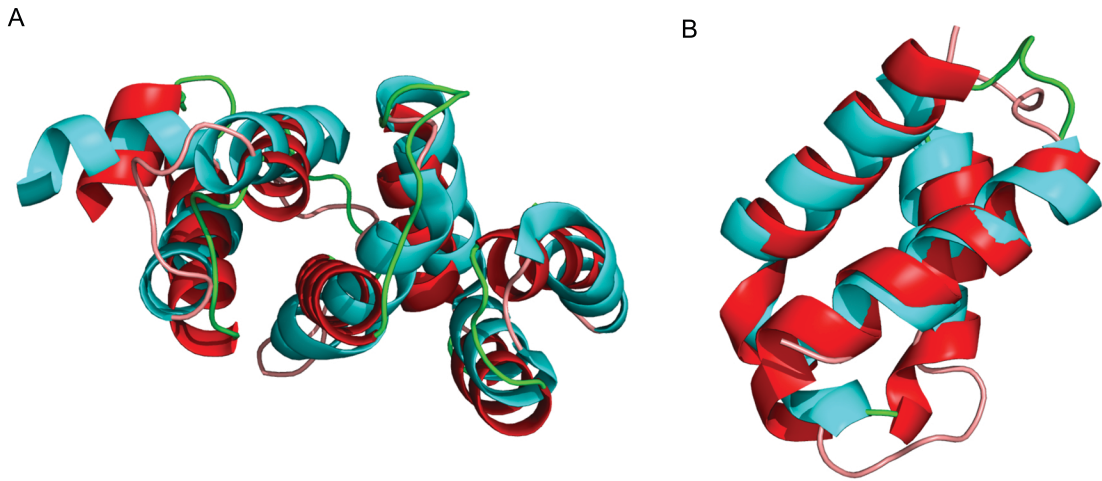

**Figure S3. Structural alignment of helical and tail domains of Gln4 NTD and *Thermotoga maritima* GatB (PDB ID: 3AL0).** A. The crystal structure of Gln4(2-110) (red) is superposed to the helical domain of *T. maritima* GatB(303-415) (cyan). B. The crystal structure of Gln4(119-178) (red) is superposed on the tail domains of GatB(422-481) (cyan).

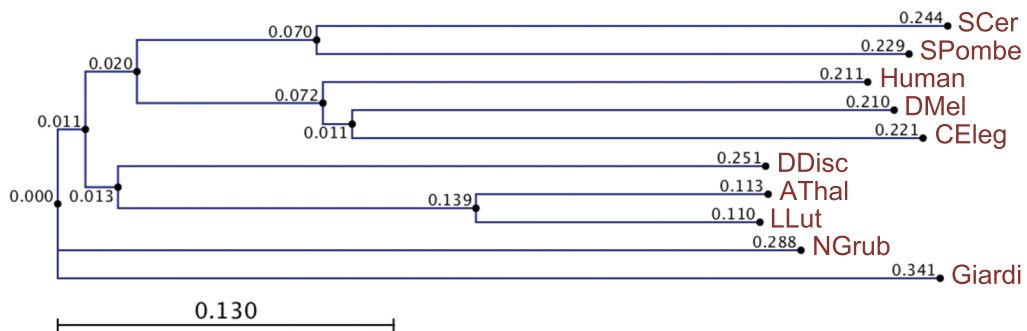

**Figure S4. Phylogenetic tree indicating the relationships between the organisms from which GlnRS NTDs were compared in Fig4B.**

49. Corpet, F. (1988) Multiple sequence alignment with hierarchical clustering. *Nucl. Acids Res.*, 16 (22), 10881-10890.

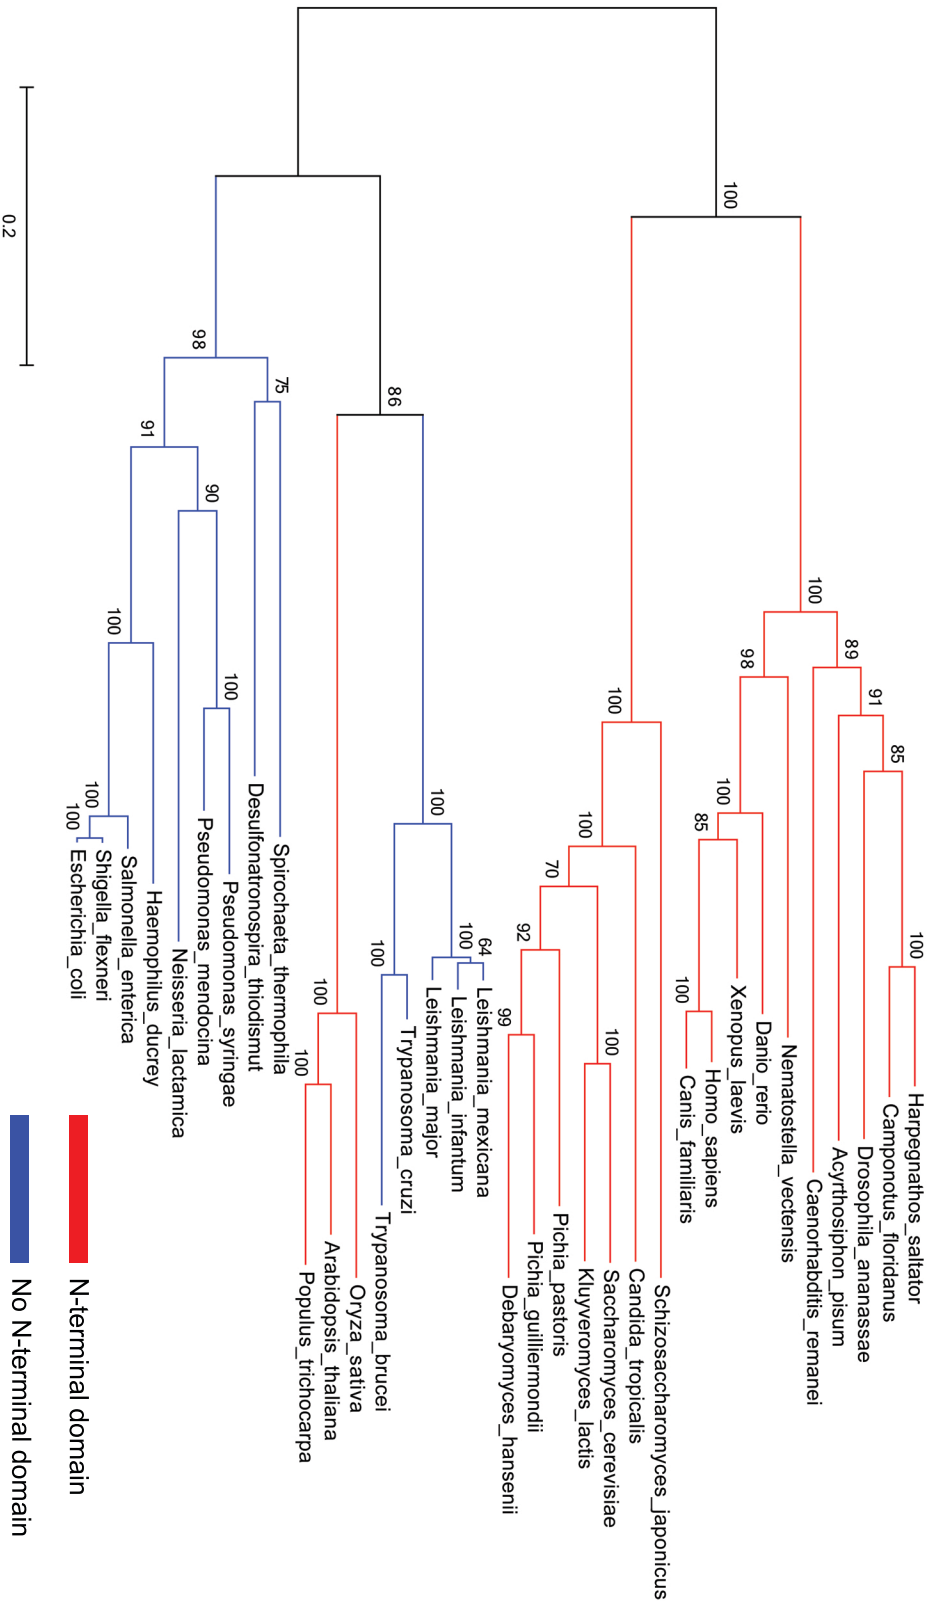

**Figure S5. Phylogenetic distribution of GlnRS with and without N-terminal appended domains.** Eukaryotic and bacterial GlnRS sequences were aligned using ClustalW and a phylogenetic tree was constructed using MEGA5, with 200 bootstraps carried out to test statistical relevance. In addition to bacteria, a set of Euglenozoa protists lack the appended domain.

54. Tamurka, K. et al. (2011) MEGA5: Molecular Evolutionary Genetics Analysis using Maximum Likelihood, Evolutionary Distance, and Maximum Parsimony Methods. *Molecular Biology and Evolution*. doi: 10.1093/molbev/msr121.
